# Supplementary material for: Effectiveness of Physiotherapy in Patients with Ankylosing Spondylitis: A Systematic Review and Meta-Analysis
Source: MDPI journal article supplement (doi:10.3390/healthcare10010132), 2022-01-10
Supplement: s1 [file s1]

## Summary of findings:

### Interventions compared to Usual care in patients with Ankylosis Spondylitis

**Patient or population:** patients with Ankylosis Spondylitis

**Setting:** rehabilitation setting

**Intervention:** Interventions

**Comparison:** Usual care

| Outcomes                                                                                                                                            | Anticipated absolute effects* (95% CI) |                                                         | Relative effect (95% CI) | Nº of participants (studies) | Certainty of the evidence (GRADE)   | Comments                                                                             |
|-----------------------------------------------------------------------------------------------------------------------------------------------------|----------------------------------------|---------------------------------------------------------|--------------------------|------------------------------|-------------------------------------|--------------------------------------------------------------------------------------|
|                                                                                                                                                     | Risk with Usual care                   | Risk with Interventions                                 |                          |                              |                                     |                                                                                      |
| Functional Index (BASFI)<br>assessed with: Bath Ankylosing Spondylitis Functional Index<br>follow-up: median 12 weeks                               | -                                      | SMD <b>0.34 SD lower</b><br>(0.53 lower to 0.14 lower)  | -                        | 1247<br>(8 RCTs)             | ⊕○○○<br>Very low <sup>a,b,c,d</sup> | Interventions may reduce functional Index but the evidence is very uncertain.        |
| Activity disease (BASDAI)<br>assessed with: Bath Ankylosing Spondylitis Disease Activity Index<br>Scale from: 0 to 10<br>follow-up: median 12 weeks | -                                      | SMD <b>0.37 SD lower</b><br>(0.64 lower to 0.11 lower)  | -                        | 1247<br>(8 RCTs)             | ⊕○○○<br>Very low <sup>a,b,c,d</sup> | Interventions may reduce activity disease but the evidence is very uncertain.        |
| Metrology (BASMI)<br>assessed with: Bath Ankylosing Spondylitis Metrology Index<br>Scale from: 0 to 10<br>follow-up: median 12 weeks                | -                                      | SMD <b>0.12 SD lower</b><br>(0.33 lower to 0.08 higher) | -                        | 362<br>(5 RCTs)              | ⊕⊕○○<br>Low <sup>a,d</sup>          | The evidence suggests interventions reduces metrology slightly.                      |
| Pain (VAS)<br>assessed with: Visual Analogue Scale<br>Scale from: 0 to 100<br>follow-up: mean 16 weeks                                              | -                                      | SMD <b>0.31 SD lower</b><br>(0.88 lower to 0.25 higher) | -                        | 813<br>(2 RCTs)              | ⊕○○○<br>Very low <sup>c,d,e</sup>   | The evidence is very uncertain about the effect of interventions on pain.            |
| Quality of Life (ASQoL)<br>assessed with: Ankylosing Spondylitis Quality of Life<br>Scale from: 0 to 18<br>follow-up: mean 16 weeks                 | -                                      | SMD <b>0.09 SD lower</b><br>(0.51 lower to 0.32 higher) | -                        | 866<br>(3 RCTs)              | ⊕○○○<br>Very low <sup>a,b,d</sup>   | The evidence is very uncertain about the effect of interventions on quality of Life. |

\*The risk in the intervention group (and its 95% confidence interval) is based on the assumed risk in the comparison group and the **relative effect** of the intervention (and its 95% CI).

CI: confidence interval; SMD: standardised mean difference

#### GRADE Working Group grades of evidence

**High certainty:** we are very confident that the true effect lies close to that of the estimate of the effect.

**Moderate certainty:** we are moderately confident in the effect estimate: the true effect is likely to be close to the estimate of the effect, but there is a possibility that it is substantially different.

**Low certainty:** our confidence in the effect estimate is limited: the true effect may be substantially different from the estimate of the effect.

**Very low certainty:** we have very little confidence in the effect estimate: the true effect is likely to be substantially different from the estimate of effect.

## Explanations

- a. Any studies with low risk of bias
- b. No direct comparison between the interventions
- c. Etherogeneity >60%
- d. Different and few follow-up
- e. All studies with high risk of bias

#### Summary of findings:

### Intervention compared to Home-based exercise programs for Patients with ankylosing spondylitis

**Patient or population:** Patients with ankylosing spondylitis

**Setting:** Rehabilitation clinic, home

**Intervention:** Intervention

**Comparison:** Home-based exercise programs

| Outcomes                                                                                                                                            | Anticipated absolute effects* (95% CI) |                                                         | Relative effect (95% CI) | № of participants (studies) | Certainty of the evidence (GRADE) | Comments                                                                                       |
|-----------------------------------------------------------------------------------------------------------------------------------------------------|----------------------------------------|---------------------------------------------------------|--------------------------|-----------------------------|-----------------------------------|------------------------------------------------------------------------------------------------|
|                                                                                                                                                     | Risk with Home-based exercise programs | Risk with Intervention                                  |                          |                             |                                   |                                                                                                |
| Functional Index (BASFI)<br>assessed with: Bath Ankylosing Spondylitis Functional Index<br>Scale from: 0 to 10<br>follow-up: median 12 weeks        | -                                      | SMD <b>0.29 SD lower</b><br>(0.79 lower to 0.12 higher) | -                        | 236<br>(4 RCTs)             | ⊕⊕○○<br>Low <sup>a,b</sup>        | The evidence suggests intervention results in a slight reduction in functional Index.          |
| Activity disease (BASDAI)<br>assessed with: Bath Ankylosing Spondylitis Disease Activity Index<br>Scale from: 0 to 10<br>follow-up: median 12 weeks | -                                      | SMD <b>0.14 SD lower</b><br>(0.42 lower to 0.15 higher) | -                        | 191<br>(3 RCTs)             | ⊕⊕○○<br>Low <sup>c,d</sup>        | The evidence suggests intervention results in a slight reduction in activity disease.          |
| Metrology (BASMI)<br>assessed with: Bath Ankylosis Arthritis Metrology Index<br>Scale from: 0 to 10<br>follow-up: median 12 weeks                   | -                                      | SMD <b>0.2 SD lower</b><br>(0.77 lower to 0.37 higher)  | -                        | 191<br>(3 RCTs)             | ⊕⊕⊕○<br>Moderate <sup>d</sup>     | Intervention probably results in a reduction in metrology.                                     |
| Pain (VAS)<br>assessed with: Visual Analogue Scale<br>Scale from: 0 to 100<br>follow-up: median 12 weeks                                            | -                                      | SMD <b>0.27 SD lower</b><br>(0.61 lower to 0.07 higher) | -                        | 166<br>(3 RCTs)             | ⊕⊕⊕○<br>Moderate <sup>d</sup>     | Intervention likely results in a slight reduction in pain.                                     |
| Quality of life (ASQoL)<br>assessed with: Ankylosing Spondylitis Quality of Life<br>follow-up: mean 4 weeks                                         | -                                      | SMD <b>0.75 SD lower</b><br>(1.31 lower to 0.2 lower)   | -                        | 52<br>(1 RCT)               | ⊕⊕○○<br>Low <sup>d,e</sup>        | The evidence suggests that intervention results in little to no difference in quality of life. |

\*The risk in the intervention group (and its 95% confidence interval) is based on the assumed risk in the comparison group and the **relative effect** of the intervention (and its 95% CI).

CI: confidence interval; SMD: standardised mean difference

Summary of findings:

Intervention compared to Home-based exercise programs for Patients with ankylosing spondylitis

**Patient or population:** Patients with ankylosing spondylitis  
**Setting:** Rehabilitation clinic, home  
**Intervention:** Intervention  
**Comparison:** Home-based exercise programs

| Outcomes | Anticipated absolute effects* (95% CI) |                        | Relative effect (95% CI) | № of participants (studies) | Certainty of the evidence (GRADE) | Comments |
|----------|----------------------------------------|------------------------|--------------------------|-----------------------------|-----------------------------------|----------|
|          | Risk with Home-based exercise programs | Risk with Intervention |                          |                             |                                   |          |

**GRADE Working Group grades of evidence**  
**High certainty:** we are very confident that the true effect lies close to that of the estimate of the effect.  
**Moderate certainty:** we are moderately confident in the effect estimate: the true effect is likely to be close to the estimate of the effect, but there is a possibility that it is substantially different.  
**Low certainty:** our confidence in the effect estimate is limited: the true effect may be substantially different from the estimate of the effect.  
**Very low certainty:** we have very little confidence in the effect estimate: the true effect is likely to be substantially different from the estimate of effect.
